# Supplementary material
Source: publisher figshare collection journal article supplement (https://tandf.figshare.com/articles/dataset/_/20137232)
Supplement: Supplementary file 2 [file 1]

**Supplementary Table 1. RT-qPCR primer sequences**

| Target                            | Forward Primer            | Reverse Primer           |
|-----------------------------------|---------------------------|--------------------------|
| <b>Reference Genes</b>            |                           |                          |
| $\beta$ Actin                     | GAAGTGTGACGTTGACATCC      | ACTCATCGTACTCCTGCTTG     |
| GAPDH                             | TTCACCACCATGGAGAAGGC      | GGCATGGACTGTGGTCATGA     |
| <b>Pro-inflammatory Markers</b>   |                           |                          |
| CXCL10                            | TCAGCACCATGAACCCAAG       | CTATGGCCCTCATTCTCACTG    |
| IL6                               | AAACCGCTATGAAGTTCCTCTC    | GTGGTATCCTCTGTGAAGTCTC   |
| TNF $\alpha$                      | CCCTCCAGAAAAGACACCATG     | GTCTGGGCCATAGAACTGATG    |
| <b>RNA sensors and co-sensors</b> |                           |                          |
| TLR3                              | GAGAACCTCCAAGAACTGCTC     | ATTGTCTGGAAACACCCCG      |
| Ifih1/MDA5                        | CCTTGAAAACCTCCCTCTTAAATCT | GCTTCTGCTTCAAATATCGTCTC  |
| Ddx58/RIG-I                       | GCTGCCATGCAGAGTGATTGGAAA  | ACTCTTGGCCACACAGCTGTAGAA |
| Zbp1                              | TGCTTTCTAGAGGACGCCACCATT  | TGGCTTCAGAGCTTGTACCTGTGT |
| Ddx60                             | ACTGGAACACTCGCTTTGG       | GAAGTAGACATCACCCAACAGG   |
| Dhx9                              | AAACTCCCCATTGAACCTCG      | TGTATCCCAGGCGTTTTCC      |
| Ifi204                            | CCAGTCACCAATACTCCACAG     | GAGCACCATCACTGTCAGG      |
| <b>Signal Transduction</b>        |                           |                          |
| IRF1                              | GGAAGCTGTGTGGAGATGTTAG    | TAGCCCTGAGTGGTGTAAC      |
| IRF3                              | GTCTTAAGGAGCTGTTAGAGATGG  | TGGTCAGAGGTAAGGGAGATAG   |
| IRF7                              | CTTCTCCAGCATGTGTCTCC      | CCTACCTCCCAGTACACCTT     |
| Myd88                             | AACAAAGGAACTGGGAGGC       | GTCTGTTCTAGTTGCCGGATC    |
