# Supplementary material
Source: publisher figshare collection journal article supplement (https://tandf.figshare.com/articles/dataset/_/20137232)

Supplementary Figure 1. Original western blots.

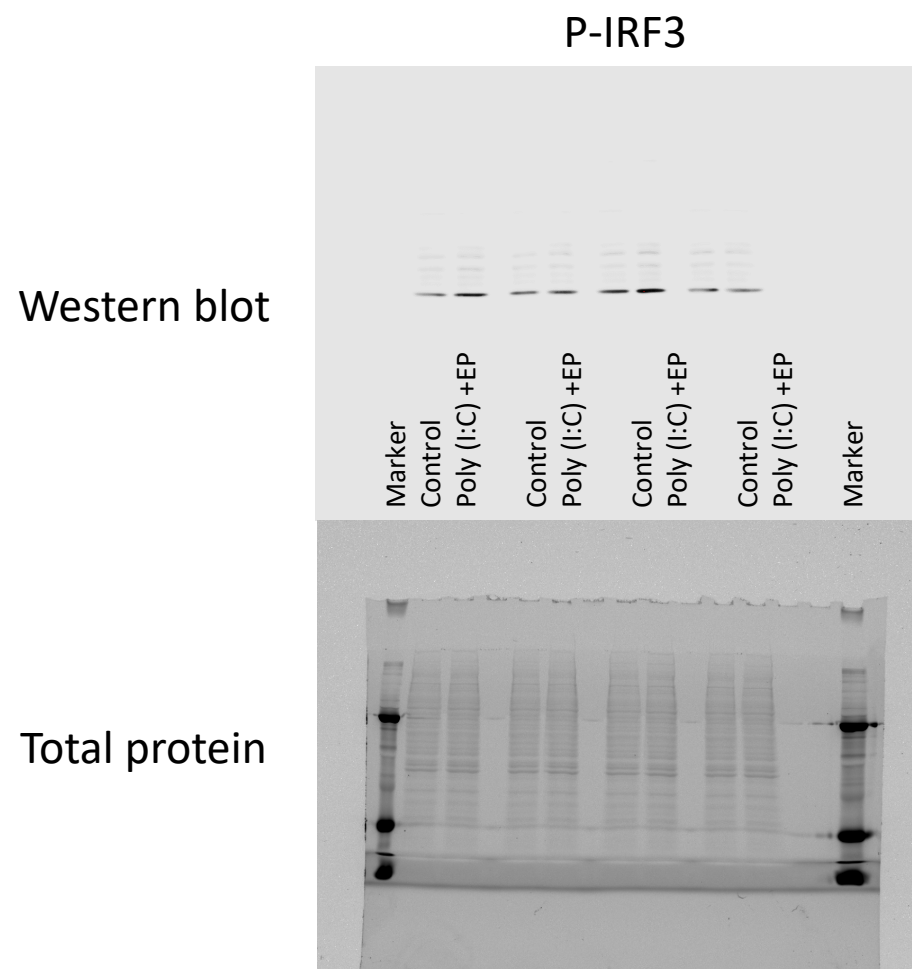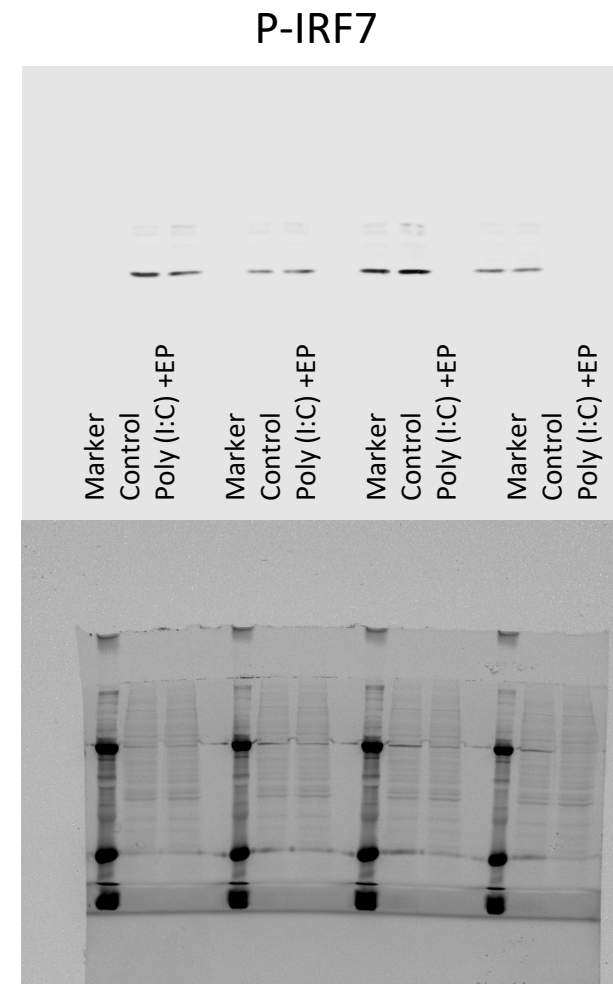

Supplement: Supplementary file 1 [file 1]
